# Supplementary material
Source: Frontiers journal article supplement (https://www.frontiersin.org/articles/521483)
Supplement: Data_Sheet_1.PDF [file Data_Sheet_1.PDF]

Table 1. Description for each item of all measures (N = 587).

| Items                                                                                           | Minimum | Maximum | Mean   | SD     |
|-------------------------------------------------------------------------------------------------|---------|---------|--------|--------|
| <b>Job satisfaction (Boateng and Hsieh, 2019)</b>                                               |         |         |        |        |
| overall, I am satisfied with my current job                                                     | 1.00    | 5.00    | 3.3867 | .87944 |
| I have plans to look for a better job elsewhere (reverse coded)                                 | 1.00    | 5.00    | 3.6746 | .82913 |
| no matter what, I will not leave my current job                                                 | 1.00    | 5.00    | 3.2726 | .92591 |
| I hate my current job (reverse coded)                                                           | 1.00    | 5.00    | 3.5400 | .90109 |
| <b>PSM (Perry, 1996)</b>                                                                        |         |         |        |        |
| B2 Meaningful public service is very important to me.                                           | 1.00    | 5.00    | 3.8620 | .67856 |
| B6 I am often reminded by daily events about how dependent we are on one another.               | 1.00    | 5.00    | 3.8722 | .68556 |
| B12 Making a difference in society means more to me than personal achievements.                 | 1.00    | 5.00    | 4.1516 | .60361 |
| B13 I am prepared to make enormous sacrifices for the good of society.                          | 1.00    | 5.00    | 4.0239 | .63416 |
| B14 I am not afraid to go to bat for the rights of others even if it means I will be ridiculed. | 2.00    | 5.00    | 4.0664 | .58188 |
| <b>Organizational commitment (Meyer et al.,1993)</b>                                            |         |         |        |        |
| I feel a strong sense of belonging to my organization                                           | 1.00    | 5.00    | 3.5400 | .87222 |
| my organization has a great deal of personal meaning for me                                     | 1.00    | 5.00    | 3.5673 | .87054 |
| I feel emotionally attached to my organization                                                  | 1.00    | 5.00    | 3.9813 | .66711 |
| I feel like part of the family in my organization.                                              | 1.00    | 5.00    | 3.6678 | .84278 |
| <b>Turnover intention (Kim et al., 1996)</b>                                                    |         |         |        |        |
| I intend to leave my organization                                                               | 1.00    | 5.00    | 2.3867 | .96103 |
| I intend to stay in my present organization as long as possible                                 | 1.00    | 5.00    | 2.5315 | .92939 |
| In general, I will not take the initiative to leave the current unit                            | 1.00    | 5.00    | 2.2811 | .82889 |
| If I stay in this unit, my future may not be better                                             | 1.00    | 5.00    | 2.7104 | .92626 |

**Table 2.** Descriptive statistics of participants in the present study (N = 587).

| Variables      | Categories           | N   | %    | Variables        | Categories       | N   | %    |
|----------------|----------------------|-----|------|------------------|------------------|-----|------|
| Gender         | Male                 | 306 | 52.1 | Child            | With children    | 389 | 66.3 |
|                | Female               | 281 | 47.9 |                  | without children | 198 | 33.7 |
| Age            | 18-25                | 40  | 6.8  | Work tenure      | 5 years or less  | 183 | 31.2 |
|                | 26-30                | 208 | 35.4 |                  | 6-10 years       | 138 | 23.5 |
|                | 31-40                | 234 | 39.9 |                  | 11-15 years      | 51  | 8.7  |
|                | 41-50                | 28  | 4.8  |                  | 16-20 years      | 41  | 7.0  |
|                | 51 or older          | 77  | 13.1 |                  | 21years or more  | 174 | 29.6 |
| Marital status | Single               | 364 | 62.0 | Working hours    | 8 hours or less  | 164 | 27.9 |
|                | Married              | 207 | 35.3 |                  | 8-12 hours       | 406 | 69.1 |
|                | Divorced/Widowed     | 16  | 2.7  |                  | 12 hours or more | 17  | 2.9  |
| Education      | High school or below | 31  | 5.3  | Managerial level | Non-management   | 355 | 60.5 |
|                | Diploma              | 117 | 19.9 |                  | Lower            | 151 | 25.7 |
|                | Bachelor             | 268 | 45.7 |                  | Middle           | 71  | 12.1 |
|                | Masters/Doctoral     | 171 | 29.1 |                  | Upper            | 10  | 1.7  |
